# Supplementary material for: Photo- and electroluminescence in thin films of covalently bonded azomethin–zinc/SiO2 hybrid materials
Source: Royal Society of Chemistry journal article supplement (doi:10.1039/c1dt10669d), 2011-01-01
Supplement: c1dt10669d.pdf [file c1dt10669d.pdf]

Supplementary Material (ESI) for Dalton Transactions

**Photo- and Electroluminescence in Thin Films of Covalently Bonded Azomethin-Zinc/SiO<sub>2</sub> Hybrid Materials**

**Chenyang Wei, Peng Jiang, Weimin Huang, Qianjun He, Xiangzhi Cui and Jianlin Shi\***

State Key Lab of High Performance Ceramics and Superfine Microstructure, Shanghai Institute of Ceramics,  
Chinese Academy of Science, Shanghai 200050, People's Republic of China.

Fax: +86 21 5241 3122; E-mail: jlshi@sunm.shnc.ac.cn

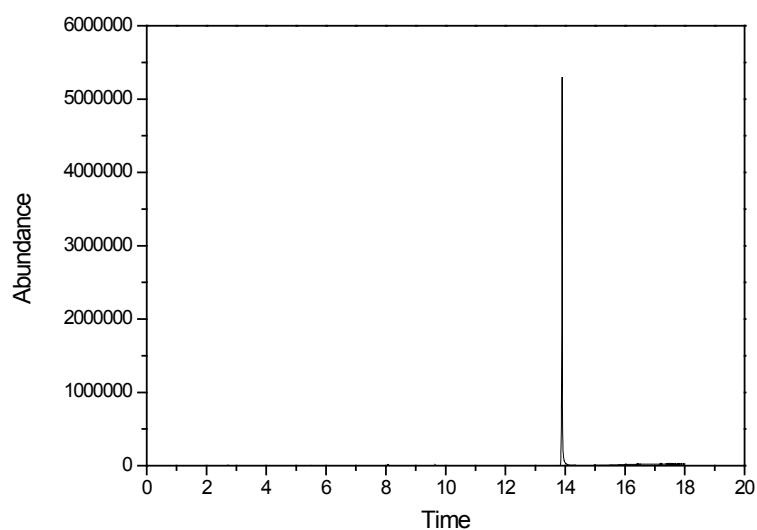

Figure S1. The GC spectra of reaction solution

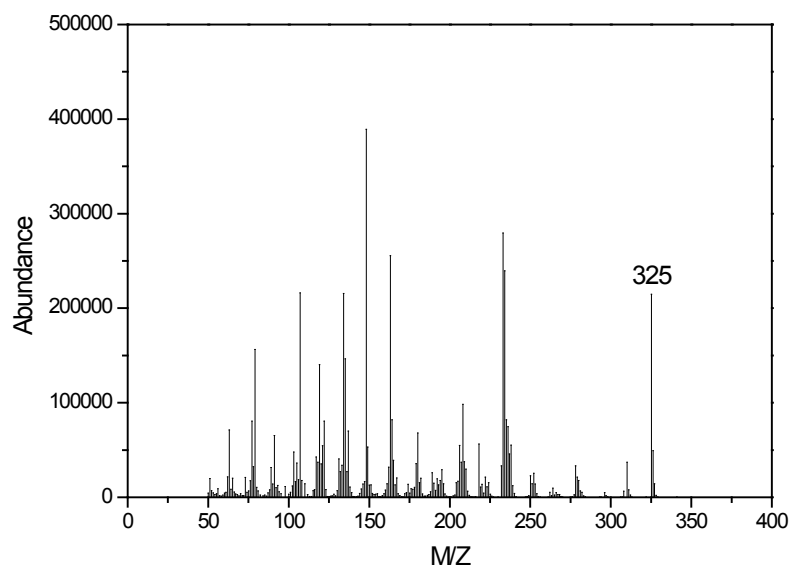

Figure S2. The mass spectra of SiAM

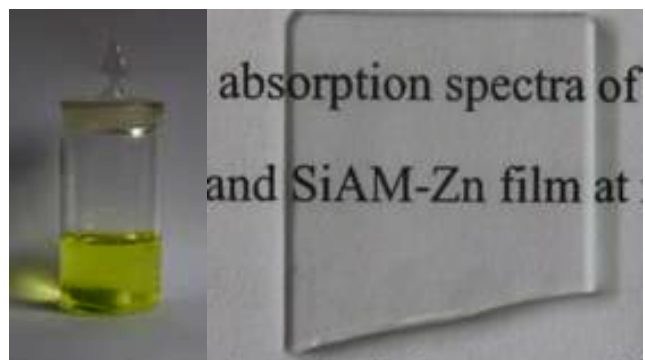

Figure S3. The photo image of the solution and the spin-coated film of SiAM-Zn.

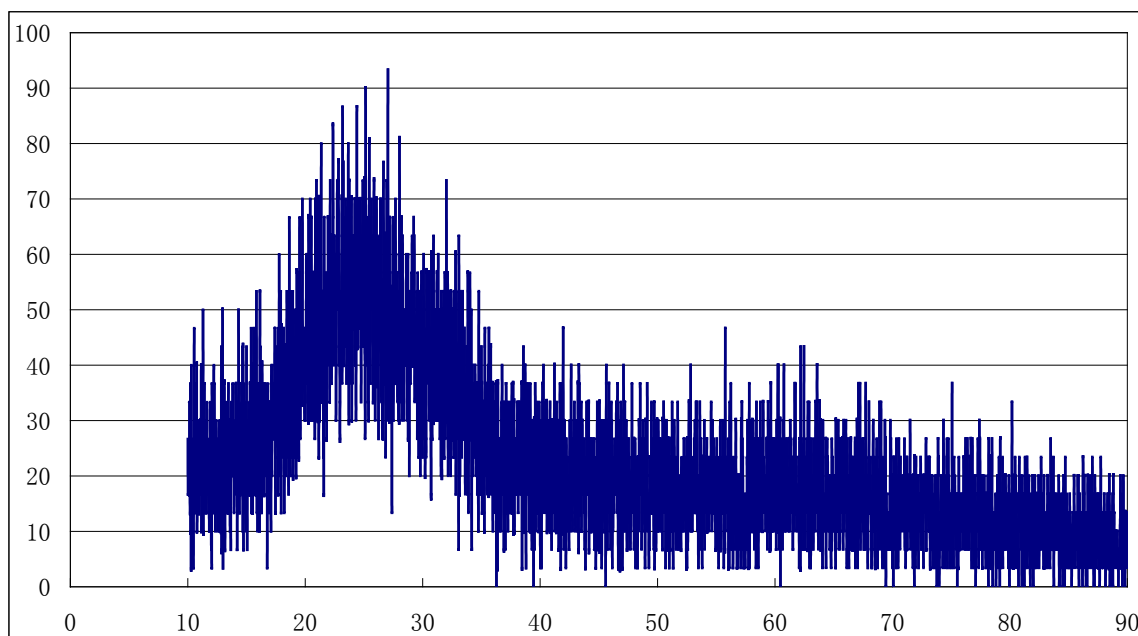

Figure S4. X-ray diffraction pattern of the hybrid film of SiAM-Zn.

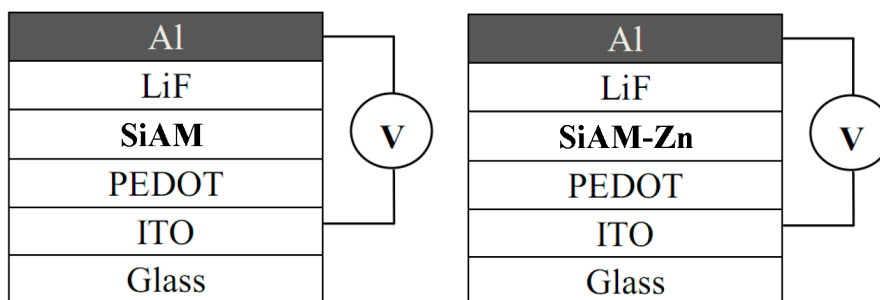

Figure S5. Schematic drawings of OLEDs.

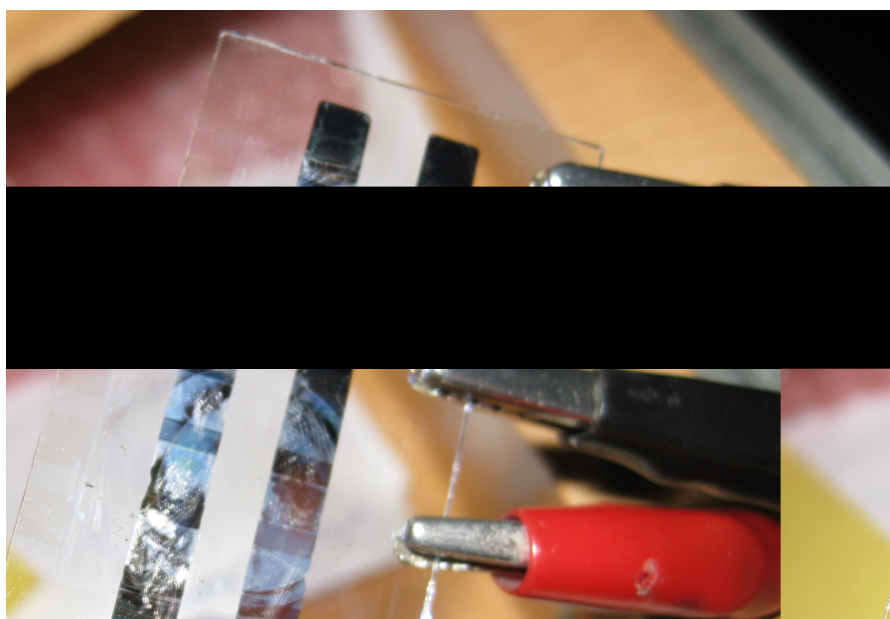

Figure S6. The OLED device with SiAM-Zn as LEL in electroluminescent emission measurement.

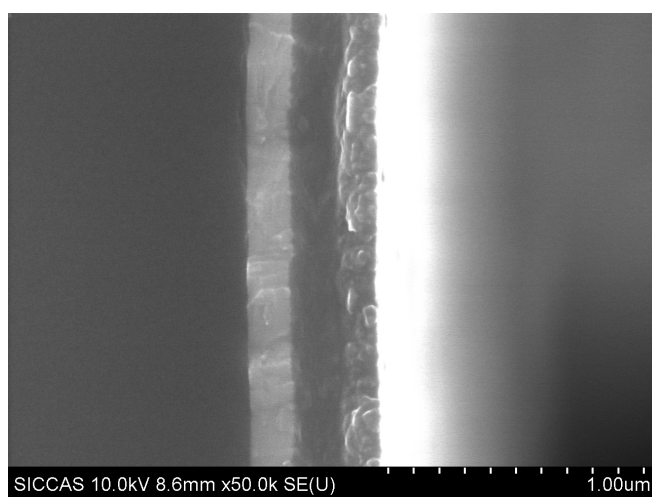

Figure S7. Sectional SEM image of the OLED device.

Table S1. Electroluminous intensity vs voltage and current with SiAM-Zn as LEL.

|                                         |       |       |       |       |       |       |       |
|-----------------------------------------|-------|-------|-------|-------|-------|-------|-------|
| Voltage (V)                             | 8     | 10    | 12    | 14    | 16    | 18    | 20    |
| Current (mA)                            | 0.29  | 0.86  | 2.5   | 5.4   | 11    | 20    | 38    |
| Luminous Intensity (Cd/m <sup>2</sup> ) | 0.075 | 0.327 | 0.585 | 0.737 | 1.287 | 1.979 | 2.539 |

Table S2. Voltage vs current with SiAM as LEL.

|              |      |      |      |      |      |      |
|--------------|------|------|------|------|------|------|
| Voltage (V)  | 10   | 12   | 14   | 16   | 18   | 20   |
| Current (mA) | 0.18 | 0.19 | 0.26 | 0.35 | 0.45 | 0.55 |
